# Supplementary material for: Long Noncoding RNA MALAT1 Promotes Laryngocarcinoma Development by Targeting miR‐708‐5p/BRD4 Axis to Regulate YAP1‐Mediated Epithelial‐Mesenchymal Transition
Source: Hindawi journal article supplement (doi:10.1155/2022/8093949), 2022-01-01

# The relative mRNA expression of MALAT1

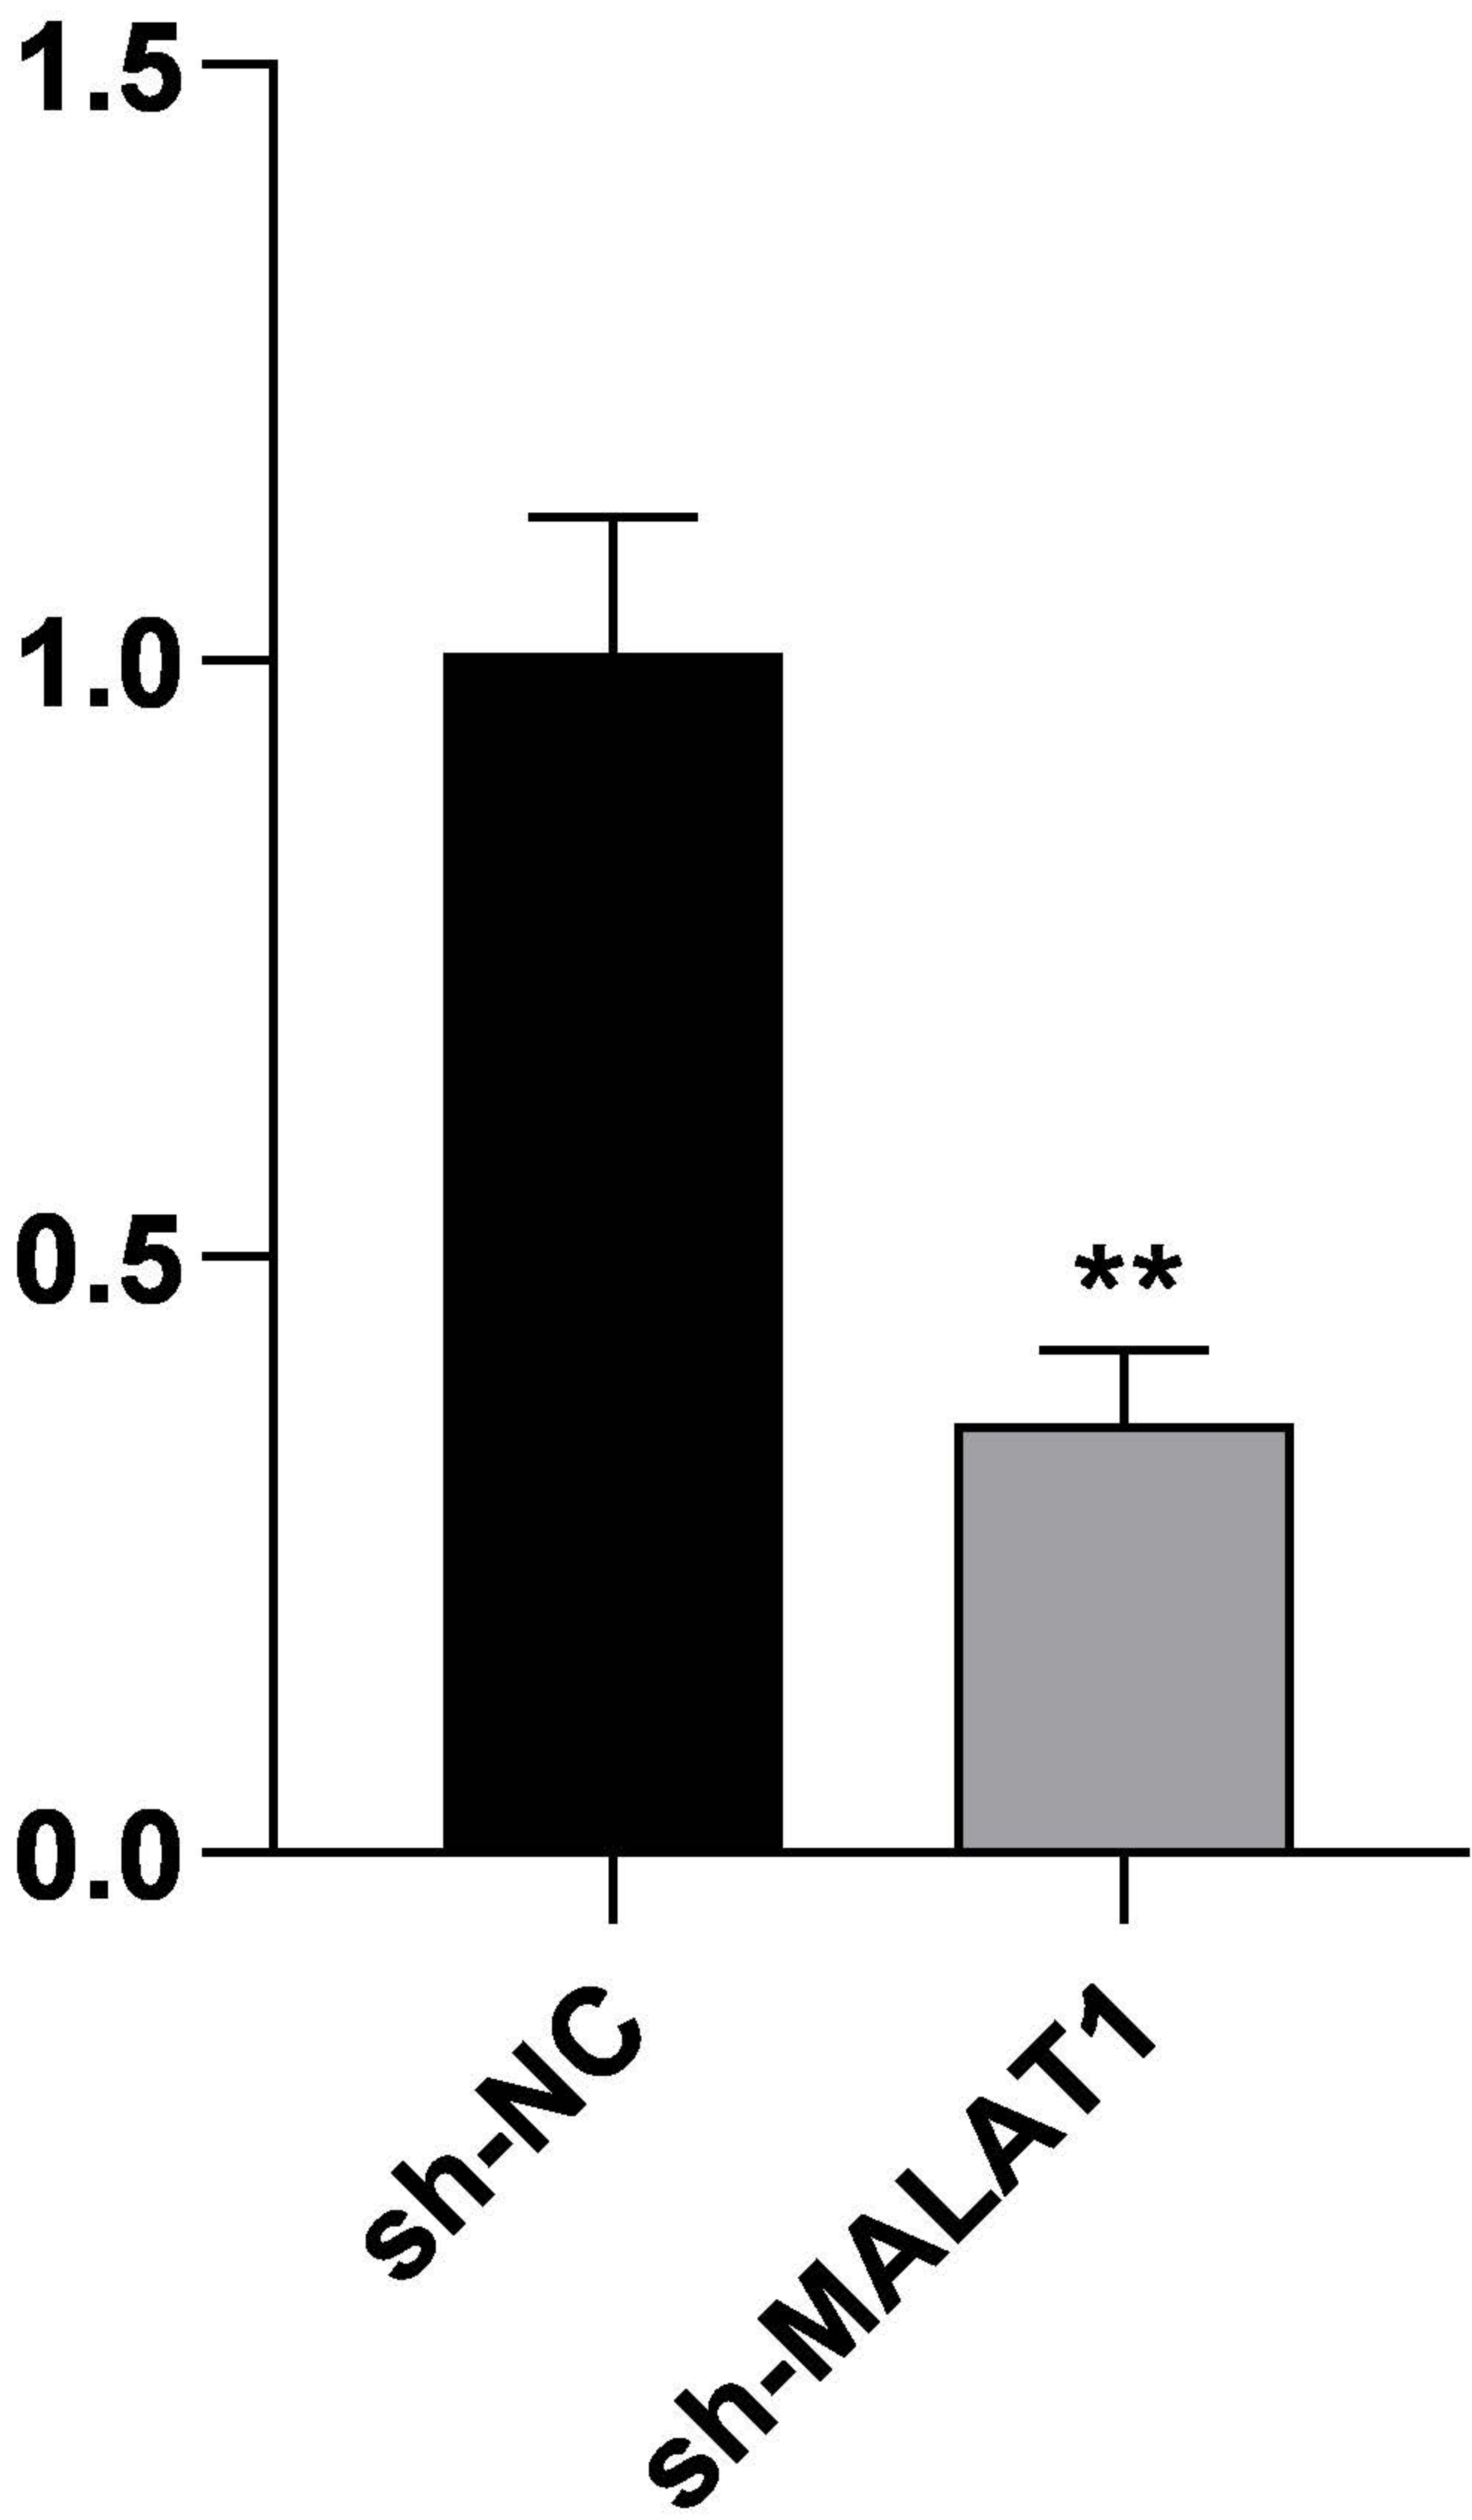

Supplement: f1 [file 8093949.f1.pdf]
